# Supplementary material
Source: Springer Nature journal article supplement (https://www.springermedizin.de/resource/supplementary/12913_2013_3435_MOESM2_ESM.pdf/9532800)

# Breakeven threshold- HTP vs OPD or Home Visit- road only travel

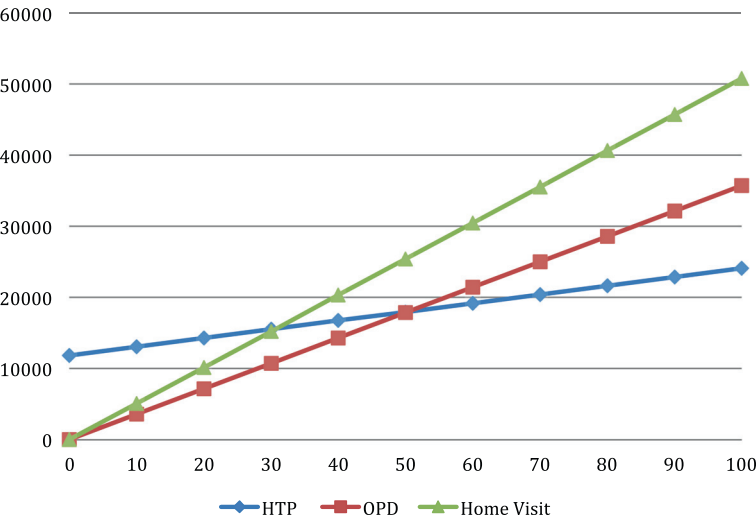

Supplement: MOESM2 [file 9532800]
